# Supplementary material for: Genome and Transcriptome Identification of a Rice Germplasm with High Cadmium Uptake and Translocation
Source: MDPI journal article supplement (doi:10.3390/plants12061226), 2023-03-08
Supplement: s1 [file s1]

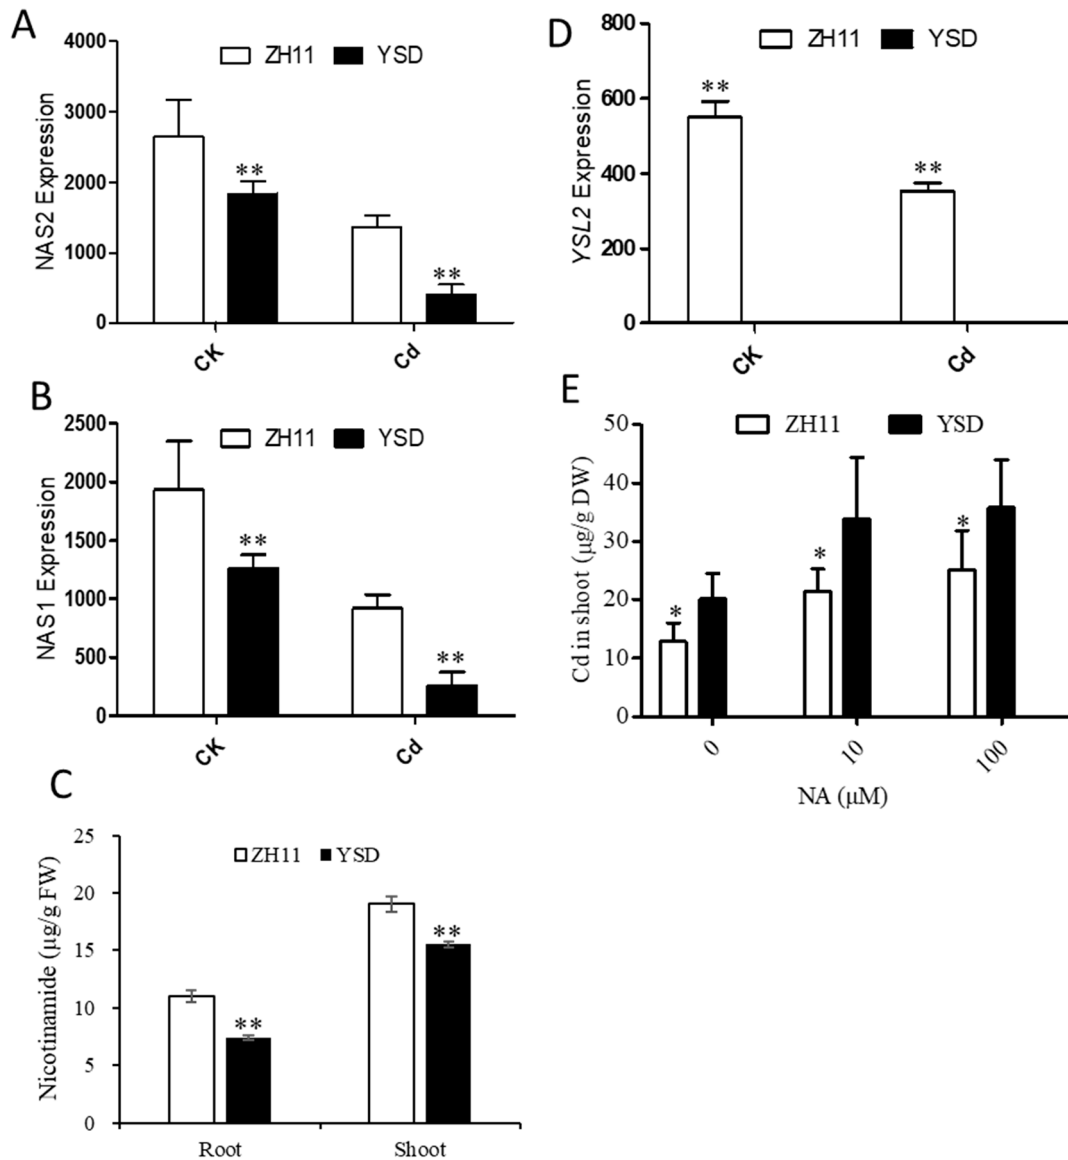

Supplementary Figure S1. Nicotinamide treatment promoted the translocation of cadmium in rice (A-D) After 4 weeks of hydroponics, rice seedlings were treated with 10  $\mu$  M Cd for 3 days, Nicotinamide synthesis gene expression level (A-B), nicotinamide content (C), and expression level of YSL2 genes were determined. Data are means ( $\pm$ SD), n=3. (E) 4-weeks-old hydroponics rice seedlings were treated with 10  $\mu$ M Cd, 10  $\mu$ M Cd plus 10 $\mu$ M nicotinamide and 10  $\mu$ M Cd plus 100  $\mu$ M for 3 days, and the Cd content in shoots was determined by ICP-MS. Data are means ( $\pm$ SD), n=5. Significant differences were determined using Student's t-test: \* $P$ <0.05; \*\* $P$ <0.01

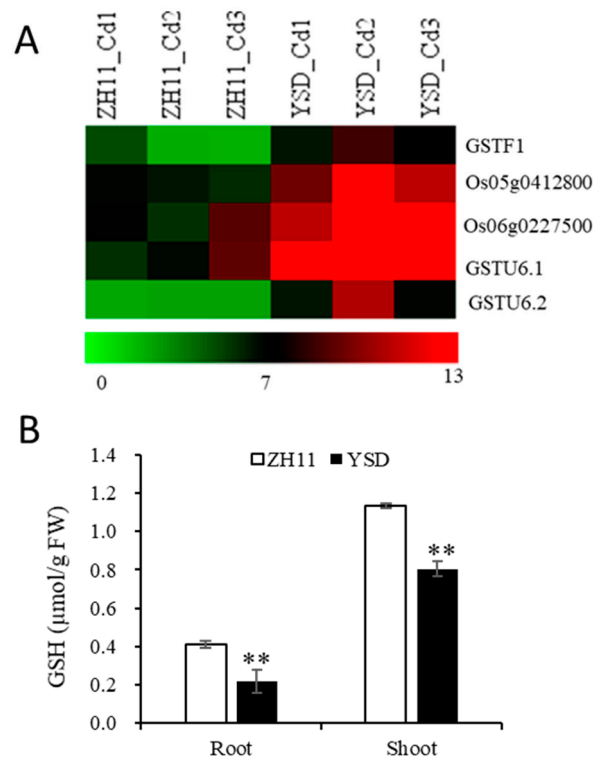

Supplementary Figure S2. GST transferase expression level and GSH content in YSD and ZH11 Rice seedling was hydroponic for 4 weeks and treated with 10  $\mu$ M cadmium Cd for 3 days. (A) Differentially expressed genes (DEGs) involved in GST transferase between YSD and ZH11 root. (B) GSH content in YSD and ZH11 root and shoot. Data are means ( $\pm$ SD), n=3. Significant differences were determined using Student's t-test: \* $P$ <0.05; \*\* $P$ <0.01

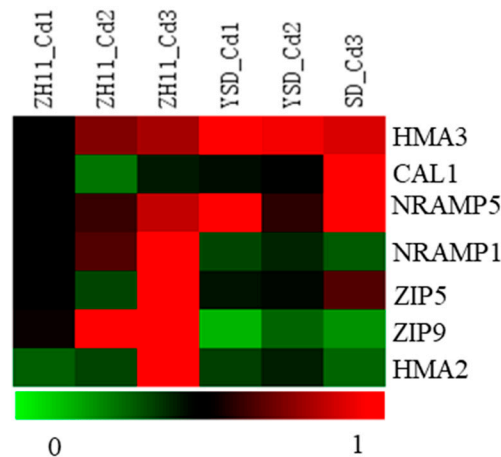

Supplementary Figure S3. Expression level of Cd uptake and translocation gene between YSD and ZH11 root under Cd treatments. Transcriptional profiling of gene responsible for Cd uptake (NRAMP5/ NRAMP1/ZIP5/ZIP9), translocation (HMA2/CAL1) and vacuolar sequestration (HMA3).
